# Supplementary material for: Microbial community structures differentiated in a single-chamber air-cathode microbial fuel cell fueled with rice straw hydrolysate
Source: PubMed Central journal article supplement (PMC3896841; doi:10.1186/1754-6834-7-9), 2014-01-17
Supplement: 1754-6834-7-9-S1.pdf [file 1754-6834-7-9-S1.pdf]

**Table S1** Summary of alpha diversity of microbial communities in anodic and cathodic biofilms, planktonic culture, and inoculum

| Sample             | Sequences | Subsample | Observed OTUs | Shannon Index | Evenness |
|--------------------|-----------|-----------|---------------|---------------|----------|
| Anodic biofilm     | 11,586    | 8,500     | 1,242 ± 14    | 5.9           | 0.83     |
| Cathodic biofilm   | 14,308    | 8,500     | 2,200 ± 25    | 6.5           | 0.85     |
| Inoculum           | 8,615     | 8,500     | 1,549 ± 2     | 6.2           | 0.84     |
| Planktonic culture | 8,683     | 8,500     | 1,085 ± 4     | 5.7           | 0.82     |

**Table S2** Distribution of sulfate and sulfur reducing bacteria observed in anodic and cathodic biofilms, planktonic culture, and inoculum (%)

| Genus                   | Anodic biofilm | Cathodic biofilm | Planktonic culture | Inoculum |
|-------------------------|----------------|------------------|--------------------|----------|
| <i>Desulfobulbus</i>    | 11.00          | 7.84             | 18.96              | 0.03     |
| <i>Desulfomicrobium</i> | 2.68           | 0.31             | 0.55               | 0.21     |
| <i>Desulforhabdus</i>   | 1.70           | 0.03             | 0.50               | 0.23     |
| <i>Desulfovibrio</i>    | 3.55           | 1.33             | 4.45               | 0.05     |
| <i>Geobacter</i>        | 5.29           | 0.18             | 0.24               | 0.01     |
| <i>The others</i>       | 0.35           | 0.20             | 0.14               | 1.18     |
| Total                   | 24.57          | 9.89             | 24.83              | 1.72     |
